# Supplementary material for: Synthesis of a New Co Metal–Organic Framework Assembled from 5,10,15,20-Tetrakis((pyridin-4-yl) phenyl)porphyrin “Co-MTPhPyP” and Its Application to the Removal of Heavy Metal Ions
Source: MDPI journal article supplement (doi:10.3390/molecules28041816), 2023-02-15
Supplement: s1 [file s1]

## Supplementary Materials

Supplementary Figure S1. HRMS spectrum of TPhPyP

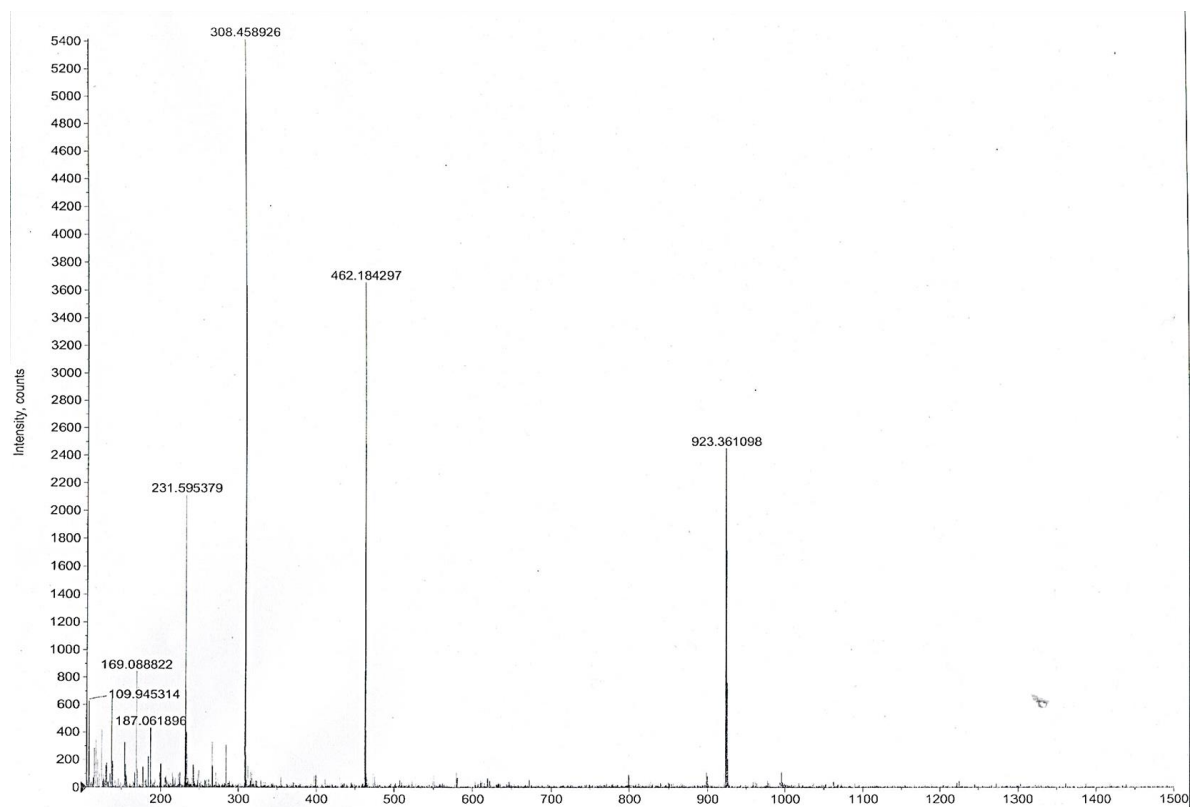

**Supplementary Figure S2.**  $^1\text{H}$  NMR spectrum of TPhPyP

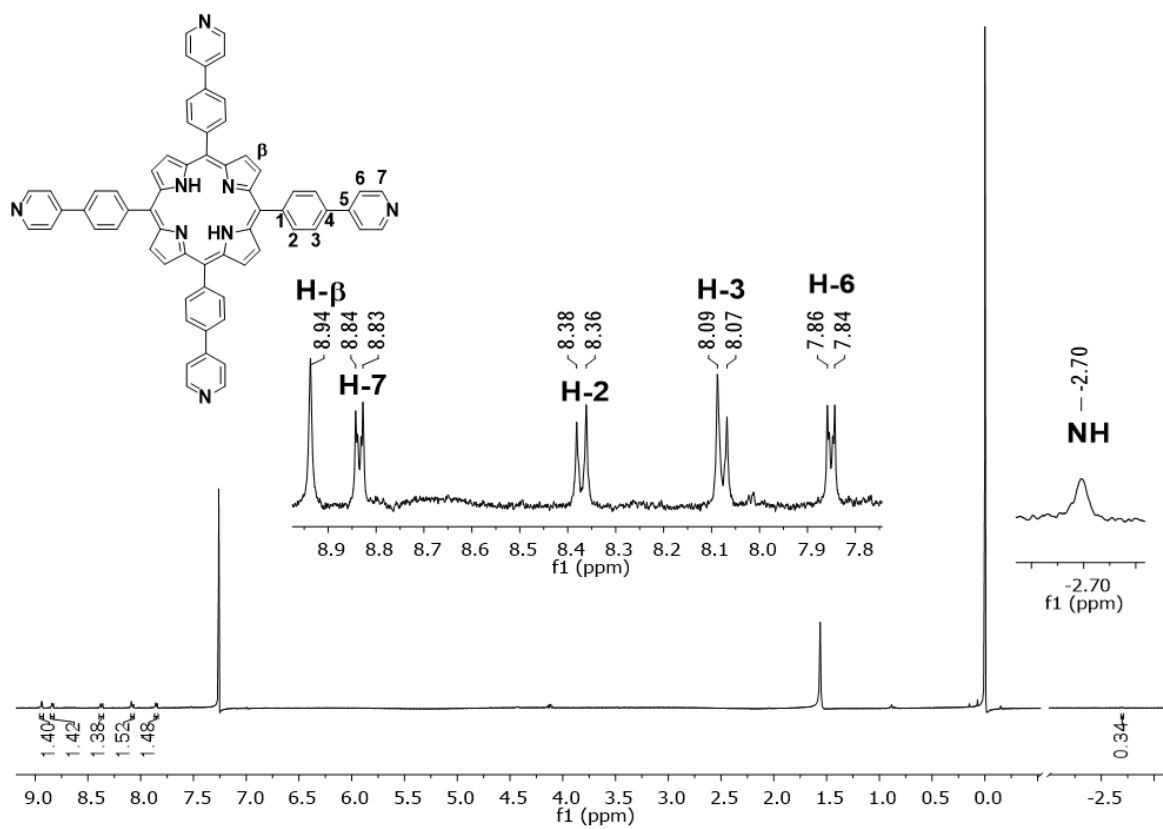

**Supplementary Figure S3.** FTIR spectra of TPhPyP a) before adsorption and b) after absorption of Pb(II).

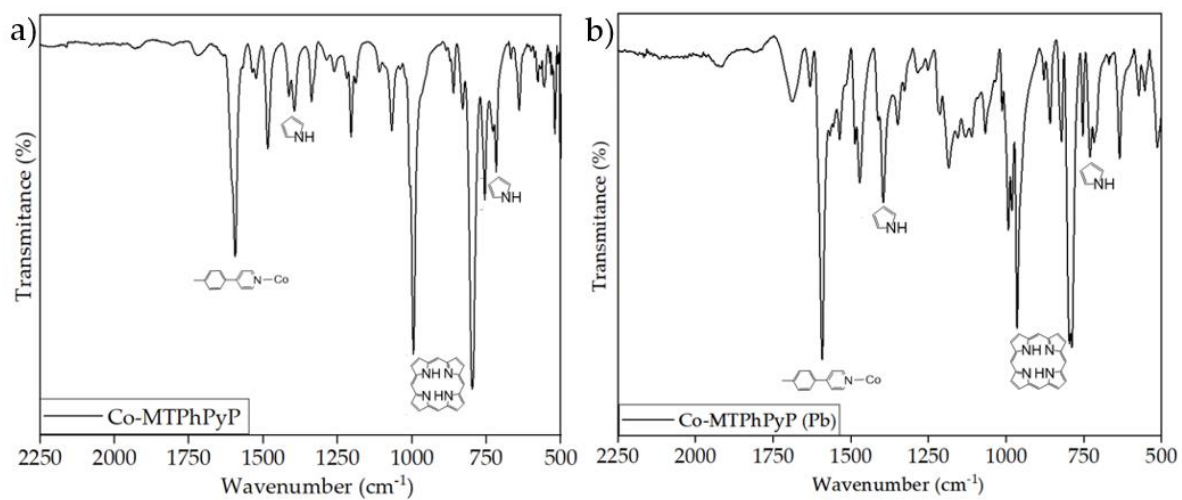

**Supplementary Table S1.** Kinetic data of the pseudo-first and pseudo-second-order absorption Pb(II) by Co-MTPhPyP .

| Concentration<br>(mg/L) | Pseudo-first-order                             |                             |       | Pseudo-second-order                            |                             |       |
|-------------------------|------------------------------------------------|-----------------------------|-------|------------------------------------------------|-----------------------------|-------|
|                         | $K_1$ (g·mg <sup>-1</sup> ·min <sup>-1</sup> ) | $q_e$ (mg·g <sup>-1</sup> ) | $R^2$ | $K_2$ (g·mg <sup>-1</sup> ·min <sup>-1</sup> ) | $q_e$ (mg·g <sup>-1</sup> ) | $R^2$ |
| 50                      | -0.549                                         | 0.98                        | 0.001 | -0.033                                         | 384.62                      | 0.998 |
